# Supplementary material for: Stuck on the Last: The Last-Presented Benefit as an Index of Attentional Refreshing in Adolescents
Source: MDPI journal article supplement (doi:10.3390/jintelligence11010004), 2022-12-23
Supplement: s1 [file s1]

### Supplementary Files

In addition to the analysis reported in the main text, we also ran a one-way Bayesian ANOVA on the reaction times, with Probe Type (3 levels: last-presented, not-last-presented, and new) as a repeated measure. The analysis resulted in a Bayes Factor of 66.23 in favour of the inclusion of the main effect of Probe Type. As can be seen in the Figure S1, the probes corresponding to the not-last-presented items (mean=884, SD= 175) and the “new” items (mean= 951 ms, SD= 195) were responded to more slowly than the probes corresponding to the last-presented items (mean= 774 ms, SD=180).

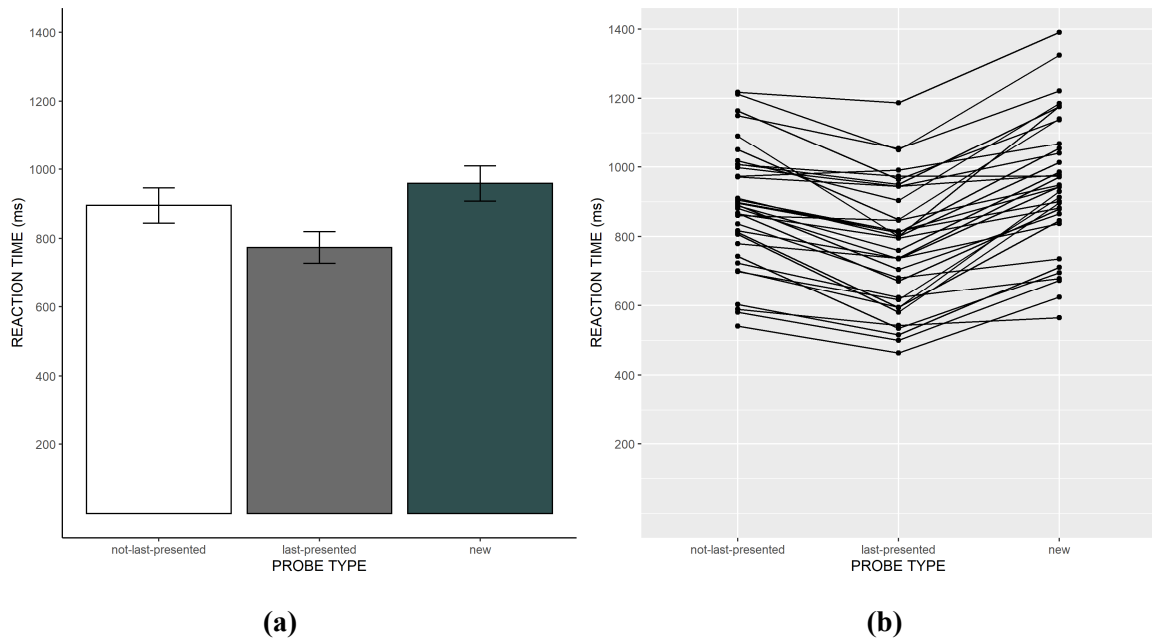

**Figure S1.** (a) Mean response times in ms for probes matching the last-presented item (“last-presented”), probes matching other list items (“not-last-presented”), and probes not matching any presented item (“new”). Error bars represent standard errors of the mean; (b) Individual mean response for probes matching the last-presented item (“last-presented”), probes matching other list items (“not-last-presented”) and probes not matching any presented item (“new”).
